# Supplementary material
Source: HighWire-hosted journal article supplement (https://bmjopen.bmj.com/content/12/9/e059244)
Supplement: inline-supplementary-material-1 [file inline-supplementary-material-1.pdf]

Supplementary table 1 The antibiotics included in WHO Essential Medicines List for Children by AWaRe group

---

**Access antibiotics**

Amikacin  
Amoxicillin  
Amoxicillin/clavulanic Acid  
Ampicillin  
Benzathine benzylpenicillin  
Benzylpenicillin  
Cefalexin  
Cefazolin  
Chloramphenicol  
Clindamycin  
Cloxacillin  
Doxycycline  
Gentamicin  
Metronidazole  
Nitrofurantoin  
Phenoxymethylpenicillin  
Spectinomycin  
Procaine benzylpenicillin  
Sulfamethoxazole/trimethoprim

**Watch antibiotics**

Azithromycin  
Cefixime  
Cefotaxime  
Ceftazidime  
Ceftriaxone  
Cefuroxime  
Ciprofloxacin  
Clarithromycin  
Meropenem  
Piperacillin/tazobactam  
Vancomycin (IV)  
Vancomycin (oral)

**Reserve antibiotics**

Ceftazidime-avibactam  
Colistin  
Fosfomicin (IV)  
Linezolid  
Meropenem-vaborbactam  
Plazomicin  
Polymyxin B

---
