# Supplementary material
Source: HighWire-hosted journal article supplement (https://bmjopen.bmj.com/content/12/9/e059244)
Supplement: inline-supplementary-material-3 [file inline-supplementary-material-3.pdf]

Supplementary table 3 A list of antimicrobial agents prescribed in this study based on WHO AWaRe classification and China's administrative categories

| Antibiotic                       | WHO AWaRe       | Antibiotic classification in China |
|----------------------------------|-----------------|------------------------------------|
| Amikacin                         | Access          | Unclassified                       |
| Amoxicillin                      | Access          | Unrestricted                       |
| Amoxicillin and enzyme inhibitor | Access          | Restricted                         |
| Ampicillin                       | Access          | Unrestricted                       |
| Ampicillin and enzyme inhibitor  | Access          | Restricted                         |
| Azidocillin                      | Access          | Unclassified                       |
| Azithromycin(IV)                 | Watch           | Restricted                         |
| Azithromycin(Oral)               | Watch           | Unrestricted                       |
| Azlocillin                       | Watch           | Unclassified                       |
| Aztreonam                        | Reserve         | Unclassified                       |
| Benzympenicillin                 | Access          | Unrestricted                       |
| Cefaclor                         | Watch           | Unrestricted                       |
| Cefaloridine                     | Access          | Unclassified                       |
| Cefamandole                      | Watch           | Unclassified                       |
| Cefatrizine                      | Access          | Restricted                         |
| Cefazedone                       | Access          | Unclassified                       |
| Cefazolin                        | Access          | Unrestricted                       |
| Cefbuperazone                    | Watch           | Unclassified                       |
| Cefdinir                         | Watch           | Restricted                         |
| Cefepime                         | Watch           | Special                            |
| Cefixime                         | Watch           | Restricted                         |
| Cefmenoxime                      | Watch           | Restricted                         |
| Cefmetazole                      | Watch           | Unclassified                       |
| Cefminox                         | Watch           | Unclassified                       |
| Cefodizime                       | Watch           | Restricted                         |
| Cefoperazone                     | Watch           | Restricted                         |
| Cefoperazone Sulbactam           | not recommended | Restricted                         |
| Cefotaxime                       | Watch           | Restricted                         |
| Cefotiam                         | Watch           | Restricted                         |
| Cefoxitin                        | Watch           | Unclassified                       |
| Cefpodoxime                      | Watch           | Restricted                         |
| Cefradine                        | Access          | Unclassified                       |
| Ceftazidime                      | Watch           | Restricted                         |
| Ceftazolidime                    | Access          | Unclassified                       |
| Ceftizoxime                      | Watch           | Restricted                         |
| Ceftriaxone                      | Watch           | Unrestricted                       |
| Cefuroxime                       | Watch           | Unrestricted                       |
| Ciprofloxacin                    | Watch           | Unclassified                       |
| Clarithromycin                   | Watch           | Unrestricted                       |
| Clindamycin                      | Access          | Unrestricted                       |

---

|                                   |                 |              |
|-----------------------------------|-----------------|--------------|
| Ertapenem                         | Watch           | Special      |
| Erythromycin                      | Watch           | Unrestricted |
| Fosfomycin                        | Reserve         | Unrestricted |
| Fusidic acid                      | Watch           | Restricted   |
| Imipenem/cilastin                 | Watch           | Special      |
| Latamoxef                         | Watch           | Restricted   |
| Levofloxacin                      | Watch           | Unclassified |
| Linezolid                         | Reserve         | Special      |
| Meropenem                         | Watch           | Special      |
| Metronidazole                     | Access          | Unrestricted |
| Mezlocillin                       | Watch           | Restricted   |
| Mezlocillin and sulbactam         | not recommended | Restricted   |
| Nitrofurantoin                    | Access          | Unrestricted |
| Ofloxacin                         | Watch           | Unclassified |
| Ornidazole                        | Unclassified    | Unclassified |
| Oxacillin                         | Access          | Unclassified |
| Panipenem and betamipron          | Watch           | Unclassified |
| Piperacillin                      | Watch           | Restricted   |
| Piperacillin and enzyme inhibitor | Watch           | Restricted   |
| Roxithromycin                     | Watch           | Unrestricted |
| Sulbenicillin                     | Watch           | Unclassified |
| Sulfamethoxazole and trimethoprim | Access          | Unrestricted |
| Ticarillin and enzyme inhibitor   | Unclassified    | Unclassified |
| Tigecycline                       | Reserve         | Special      |
| Tobramycin                        | Watch           | Unclassified |
| Vancomycin                        | Watch           | Special      |

---
